# Addition of Sodium Bicarbonate to Lidocaine Decreases the Duration of Peripheral Nerve Block in the Rat

Catherine J. Sinnott, B.A.,\* Joseph M. Garfield, M.D.,\* Johannes G. Thalhammer, D.V.M.,† Gary R. Strichartz, Ph.D.\*‡

**Background:** Adding sodium bicarbonate to lidocaine to enhance its efficacy during peripheral nerve block is controversial. The authors studied the effect of adding sodium bicarbonate to lidocaine with and without epinephrine *versus* equivalent alkalization by sodium hydroxide (NaOH) on onset, degree, and duration of peripheral nerve block.

**Methods:** Part I examined alkalization by sodium bicarbonate *versus* NaOH to pH 7.8 on 0.5% lidocaine, with and without epinephrine (1:100,000), prepared from crystalline salt. Part II examined 0.5% and 1.0% commercial lidocaine solutions, with and without epinephrine, either unalkalinized or alkalized with sodium bicarbonate or NaOH. With NaOH, pH was adjusted to 7.8, but with sodium bicarbonate, no pH adjustments were made to simulate clinical conditions.

**Results:** In part I, addition of either NaOH or sodium bicarbonate to 0.5% lidocaine without epinephrine produced a faster onset than did unalkalinized lidocaine, without effecting degree or duration of block. In solutions with epinephrine there were no differences in onset, degree, or duration between lidocaine alkalized with sodium bicarbonate *versus* NaOH. In part II, addition of sodium bicarbonate or NaOH to 1.0% commercial lidocaine without epinephrine did not accelerate onset compared with the unalkalinized solution. However, adding sodium bicarbonate decreased the degree and duration of block by 25% and more than 50%, respectively, compared with lidocaine unalkalinized and alkalized with NaOH. With epinephrine, sodium bicarbonate hastened onset without effecting degree and duration compared with the unalkalinized solution.

**Conclusions:** With 1% commercial lidocaine without epinephrine, sodium bicarbonate decreases the degree and duration of block. However, in solutions with epinephrine, sodium bicarbonate hastens onset, without effecting degree or duration. (Key words: Adjuvant; epinephrine; local anesthesia.)

This article is featured in "This Month in Anesthesiology." Please see this issue of ANESTHESIOLOGY, page 5A.

\* Pain Research Center, Department of Anesthesiology, Perioperative and Pain Medicine, Brigham and Women's Hospital; † Klinikvorstand, Medizinische Klinik; ‡ Department of Biological Chemistry and Molecular Pharmacology, Harvard Medical School.

Received from the Pain Research Center, Department of Anesthesiology, Perioperative and Pain Medicine, Brigham and Women's Hospital, Boston, Massachusetts; the Department of Biological Chemistry and Molecular Pharmacology, Harvard Medical School, Boston, Massachusetts; and Klinikvorstand, Medizinische Klinik, Veterinärmedizinische Universität, Wien, Austria. Submitted for publication January 12, 2000. Accepted for publication May 18, 2000. Supported by grant No. GM 35647 from the US Public Health Service, National Institutes of Health, Bethesda, Maryland (to Dr. Strichartz).

Address correspondence to Dr. Strichartz: Pain Research Center, Department of Anesthesia, Brigham and Women's Hospital, Harvard Medical School, Boston, Massachusetts 02115. Address electronic mail to: gstrichz@zeus.bwh.harvard.edu. Reprints will not be available from the authors. Individual article reprints may be purchased through the Journal Web site, [www.anesthesiology.org](http://www.anesthesiology.org).

MANY anesthesiologists believe that adding sodium bicarbonate to plain lidocaine hydrochloride can enhance the efficacy of this local anesthetic. This topic has been most widely investigated in epidural anesthesia. Studies have shown that adding sodium bicarbonate to lidocaine hydrochloride without epinephrine improves the quality of epidural block, whereas adding sodium bicarbonate to lidocaine with epinephrine does not. The addition of 8.4% sodium bicarbonate to 2% lidocaine hydrochloride without epinephrine (1:10, vol:vol) was shown to decrease onset time<sup>1,2</sup> and enhance the depth of epidural block at L4-S1.<sup>2</sup> When bicarbonate was added to 2% lidocaine hydrochloride with epinephrine (1:200,000), neither onset time nor depth of epidural block at L4-S1 roots was altered.<sup>3</sup>

Most clinical investigators addressing this question have used epidural anesthesia as their paradigm. Accordingly, the clinical literature remains unclear as to whether adding sodium bicarbonate to either plain lidocaine or lidocaine with epinephrine improves the quality of peripheral nerve block. In addition, the effect of bicarbonate on lidocaine's onset of action in peripheral nerve block remains controversial. For example, Chow *et al.*<sup>4</sup> found that adding 8.4% sodium bicarbonate to 1.5% lidocaine hydrochloride (1:10) with epinephrine (1:200,000) did not speed the onset of analgesia in axillary brachial plexus block. However, adding sodium bicarbonate at the same concentration and volume ratio to 2% lidocaine, with and without epinephrine (1:100,000), did decrease the onset time of peribulbar anesthesia.<sup>5</sup> Apart from effects on onset, the actions of bicarbonate on the depth and duration of peripheral nerve block with lidocaine has not been previously described.

In the present study we used a well-defined laboratory model, *i.e.*, sciatic nerve block in the rat,<sup>6,7</sup> to address the effect of sodium bicarbonate on peripheral nerve block performed with lidocaine. We compared onset time, degree of impairment of nociception, *i.e.*, depth of analgesia, and block duration with different lidocaine solutions in rats receiving percutaneous sciatic nerve blocks. Lidocaine solutions, with and without epinephrine, were prepared from either crystalline salt or from a commercially available source (Abbott Laboratories, North Chicago, IL). These solutions were either not alkalized (plain lidocaine), alkalized with sodium bicarbonate, or alkalized with sodium hydroxide (NaOH).

**Table 1. Composition of Solutions Injected for Sciatic Nerve Block**

| Name                                                                  | n  | Symbol | Description                                                                 | pH $\pm$ 0.05 |
|-----------------------------------------------------------------------|----|--------|-----------------------------------------------------------------------------|---------------|
| <b>Part I. 0.5% Solutions prepared from crystalline lidocaine HCl</b> |    |        |                                                                             |               |
| L                                                                     | 10 | ▲      | 0.5% lidocaine HCl (unalkalinized)                                          | 5.13          |
| LOH                                                                   | 10 | ○      | 0.5% lidocaine HCl with NaOH                                                | 7.85          |
| LBC                                                                   | 10 | ●      | 0.5% lidocaine with 8.4% sodium bicarbonate (10:1)                          | 7.85          |
| LE                                                                    | 10 | □      | 0.5% lidocaine with epi. (1:100,000) and NaOH                               | 7.85          |
| LBCE                                                                  | 10 | ■      | 0.5% lidocaine HCl epi. (1:100,000) and 8.4% sodium bicarbonate (10:1)      | 7.85          |
| <b>Part II. 0.5% Commercial lidocaine HCl solutions</b>               |    |        |                                                                             |               |
| CL                                                                    | 10 | ▲      | 0.5% lidocaine HCl (unalkalinized)                                          | 6.58          |
| CLOH                                                                  | 10 | ○      | 0.5% lidocaine HCl with NaOH                                                | 7.85          |
| CLBC                                                                  | 10 | ●      | 0.5% lidocaine with 8.4% sodium bicarbonate (10:1)                          | 7.99          |
| CLE                                                                   | 10 | □      | 0.5% lidocaine HCl with epi. (1:100,000) (unalkalinized)                    | 6.46          |
| CLBCE                                                                 | 10 | ■      | 0.5% lidocaine HCl with epi. (1:100,000) and 8.4% sodium bicarbonate (10:1) | 7.85          |
| <b>1.0% Commercial lidocaine HCl solutions</b>                        |    |        |                                                                             |               |
| *CL                                                                   | 10 | ▲      | 1% lidocaine HCl (unalkalinized)                                            | 6.64          |
| *CLOH                                                                 | 10 | ○      | 1% lidocaine HCl with NaOH                                                  | 7.85          |
| *CLBC                                                                 | 9  | ●      | 1% lidocaine with 8.4% sodium bicarbonate (10:1)                            | 7.75          |
| *CLE                                                                  | 9  | □      | 1% lidocaine HCl with epi. (1:200,000) (unalkalinized)                      | 4.46          |
| *CLBCE                                                                | 9  | ■      | 1% lidocaine HCl with epi. (1:200,000) and 8.4% sodium bicarbonate (10:1)   | 7.49          |

## Materials and Methods

### Animals

Male Sprague-Dawley rats (Taconic Farms, Germantown, NY) weighing 250–350 g were housed in the Brigham and Women's Hospital animal facilities with a 12-h light–dark cycle. All behavioral testing and surgical procedures in this study were approved by the Harvard Medical Area Committee on Animals. All animals used in these experiments were handled for 15 min/day for a 2-week period before the tests to preclude stress-induced analgesia in rats during experimentation. Handling procedures involved persistent tactile contact with one experimenter (C.J.S.) and several applications of a deep pinch with serrated forceps to the fifth metatarsal.<sup>6</sup>

### Experimental Design

Percutaneous sciatic nerve blocks were performed with five lidocaine solutions prepared from either crystalline lidocaine hydrochloride at a concentration of 0.5% or commercial lidocaine at a concentration of 0.5% and 1.0% (Abbott Laboratories; table 1).

### Preparation of 0.5% Solutions from Crystalline Lidocaine Hydrochloride

Five 0.5% lidocaine solutions (all exactly 0.5% with pH = 5.13 or 7.85) were prepared from the crystalline salt: (1) L: 0.5% plain lidocaine hydrochloride (pH = 5.13  $\pm$  0.05)—50 mg lidocaine hydrochloride powder

(Sigma Chemical, St. Louis, MO) was dissolved in 10 ml sterile water (Abbott Laboratories); (2) LOH: 0.5% lidocaine hydrochloride alkalinized with NaOH (pH = 7.85)—50 mg lidocaine hydrochloride powder was dissolved in 10 ml sterile water, and the pH was adjusted to 7.85 with 30  $\mu$ l (1:333) of 2N NaOH (Fisher Scientific, Pittsburgh, PA); (3) LBC: 0.5% lidocaine hydrochloride with 8.4% sodium bicarbonate (10:1; pH = 7.85)—10 ml of 0.55% lidocaine hydrochloride was prepared by dissolving 55 mg lidocaine hydrochloride in 10 ml sterile water; 10 ml of 8.4% sodium bicarbonate was prepared by dissolving 840 mg of sodium bicarbonate powder (Sigma Chemical) in 10 ml sterile water, and 1 ml of this solution was added to the 10-ml lidocaine solution to make a resultant containing 55 mg lidocaine in 11 ml = 0.5%; (4) LE: 0.5% lidocaine with epinephrine (1:100,000) alkalinized with NaOH (pH = 7.85)—100 mg crystalline epinephrine hydrochloride (Sigma Chemical) was dissolved in 10 ml sterile water, and 10  $\mu$ l of this (1:100) solution was added to 10 ml of 0.5% lidocaine (made as above) to achieve a final epinephrine concentration of 1:100,000; the pH of this solution was adjusted to 7.85 with 40  $\mu$ l (1:250) of 2N NaOH; and (5) LBCE: 0.5% lidocaine with epinephrine (1:100,000) alkalinized to pH 7.85 with 8.4% sodium bicarbonate (10:1) (pH = 7.85)—this solution was prepared according to the combined regimens 3 and 4, described above. All pHs were measured at room temperature (20–22°C) using a Model 611 pH meter (Orion

Research Inc., Boston, MA) with a combination Ag/AgCl-glass electrode (Corning Inc., Acton, MA) in a slowly stirred solution to minimize vortex-induced dissolution of carbon dioxide.

#### *Preparation of Crystalline Control Solutions*

Three control solutions were prepared. The first contained only sterile water, the second contained epinephrine dissolved in sterile water to a concentration of 1:100,000 (according to regimen 4), and the third contained 8.4% sodium bicarbonate dissolved in sterile water (according to regimen 3) and diluted to a ratio of 1:10.

#### *Preparation of Commercial 0.5% Lidocaine Solutions*

Five 0.5% lidocaine solutions were prepared from commercially available solutions. The lidocaine concentration in all solutions was exactly 0.5%, and in solutions with NaOH, pH was adjusted to 7.85. In solutions with epinephrine or sodium bicarbonate, there was no intentional adjustment of pH, in order to simulate clinical conditions: (1) CL: 0.5% unalkalinized lidocaine hydrochloride injection (pH = 6.58); (2) CLOH: 0.5% lidocaine hydrochloride alkalized with NaOH (pH = 7.85)—10 ml of 0.5% lidocaine hydrochloride injection was alkalized with 10  $\mu$ l (1:1000) of 2N NaOH; (3) CLBC: 0.5% lidocaine hydrochloride alkalized with 8.4% sodium bicarbonate (10:1; pH = 7.99)—1% lidocaine hydrochloride injection (Abbott Laboratories) was diluted to 0.55% solution with 0.9% NaCl injection (Abbott Laboratories); 1 ml of 8.4% sodium bicarbonate injection (Abbott Laboratories) was added to 10 ml of the 0.55% lidocaine solution; (4) CLE: 0.5% unalkalinized lidocaine hydrochloride containing epinephrine (1:100,000) injection (Abbott Laboratories; pH = 6.46); and (5) CLBCE: 0.5% lidocaine hydrochloride with 8.4% sodium bicarbonate (10:1) and epinephrine (1:100,000) (pH = 7.85)—1% lidocaine hydrochloride injection was diluted to 0.55% with 0.9% NaCl injection; 1 ml of 8.4% sodium bicarbonate injection was added to 10 ml of the 0.55% lidocaine hydrochloride solution, and 110  $\mu$ l of epinephrine hydrochloride (1:1000) injection (American Regent Laboratories, Shirley, NY) was added to this solution.

#### *Preparation of Commercial 1.0% Lidocaine Solutions*

Five 1.0% lidocaine solutions were prepared from commercially available solutions. The lidocaine concentration in all solutions was exactly 1.0%, and in solutions with NaOH, pH was adjusted to 7.85. In solutions with epinephrine or sodium bicarbonate there was, again, no intentional adjustment of pH, to simulate clinical conditions: (1) \*CL: 1% lidocaine hydrochloride injection (pH = 6.64); (2) \*CLOH: 1% lidocaine hydrochloride alkalized with NaOH (pH = 7.85)—10 ml of 1% lidocaine hydrochloride injection was alkalized to pH =

7.85 with 15  $\mu$ l (1:667) of 2N NaOH; (3) \*CLBC: 1% lidocaine hydrochloride alkalized with 8.4% sodium bicarbonate (10:1; pH = 7.75)—a solution of 1.5% lidocaine hydrochloride injection (Abbott Laboratories) was diluted to 1.1% with 0.9% NaCl injection; 1 ml of 8.4% sodium bicarbonate injection was then added to 10 ml of the 1.1% lidocaine solution; (4) \*CLE: unalkalinized 1% lidocaine hydrochloride with epinephrine (1:200,000) injection (Abbott Laboratories; pH = 4.46); and (5) \*CLBCE: 1% lidocaine hydrochloride with epinephrine (1:200,000) alkalized with 8.4% sodium bicarbonate (10:1; pH = 7.49)—a solution of 1.5% lidocaine hydrochloride injection was diluted to 1.1% with 0.9% NaCl injection; 1 ml of 8.4% sodium bicarbonate injection was then added to 10 ml of the 1.1% lidocaine solution, and 110  $\mu$ l of epinephrine hydrochloride injection was then added to this solution.

#### *Preparation of Commercial Control Solutions*

Three control solutions were prepared for this component of the study. The first contained only 0.9% NaCl injection, the second contained 1 ml of 8.4% sodium bicarbonate injection combined with 10 ml of 0.9% NaCl injection, and the third contained 100  $\mu$ l of epinephrine hydrochloride injection (1:1000) combined with 10 ml of 0.9% NaCl injection to make a resultant concentration of 1:100,000.

#### *Injection of Lidocaine Solutions*

The injection technique used in this study was the same used by Thalhammer *et al.*<sup>6</sup> and Popitz-Bergez *et al.*<sup>7</sup> to produce a motor and sensory block of the sciatic nerve in a rat. Fifteen groups of rats, each group with n = 9 or 10, received a percutaneous injection with a 27-gauge needle of 100  $\mu$ l of one of the 15 lidocaine solutions previously described. An additional six groups of rats, each with n = 4, received a percutaneous injection of 100  $\mu$ l of one of six control solutions.

#### *Evaluation of Sensory Functional Deficit*

Analgesia was measured in the ipsilateral limb every 10 min after injection for up to 40 min, and every 10 min thereafter. The neurologic evaluation was a modification of the protocol described by Thalhammer *et al.*<sup>6</sup> Nociception was quantified by evaluating the rat's withdrawal response to a deep pinch (forceful enough to reach bone) by serrated forceps at the fifth metatarsal. The withdrawal response was graded on an ordinal scale of 0 (no withdrawal response) to 4 (a normal, brisk withdrawal response). A score of 4 meant a normal reaction characterized by a brisk, strong paw withdrawal, vocalization, and an attempt to bite the forceps. A score of 3 was characterized by a slower, weaker withdrawal response, vocalization, and no attempt to bite the forceps. A score of 2 corresponded to an even



slower withdrawal response, no vocalization, and no biting of the forceps. A score of 1 was characterized by a very weak attempt to withdraw. And a score of 0 was given when the rat showed none of these responses. Previous reports showed that motor block of the sciatic nerve could not account for withdrawal response deficits, proving that true sensory loss was being tested.<sup>6</sup>

Analgesia was reported as the mean withdrawal response to deep pinch  $\pm$  SD. The duration of block was defined as the time until the response returned to a value of 3 (75% of normal) after injection. The time of onset was the time it took for the response to reach a value of 2 (50% of normal), from a normal response of 4, after injection. The maximum degree of impairment was considered the lowest withdrawal response score achieved after injection of local anesthetic.

### Statistical Analysis

The duration of onset, the degree of block, and the duration of block achieved with lidocaine solutions were compared using the Mann-Whitney U rank sum test (SPSS Software, Chicago, IL). Only groups of rats receiving injection of lidocaine solutions at the same concentration (either 0.5% or 1.0%) and prepared from the same materials (crystalline or commercial lidocaine) were compared against each other. Furthermore, only pairwise comparisons were made between either two groups (those receiving injections of lidocaine solutions without epinephrine) or three groups (those receiving injections of lidocaine solutions with epinephrine). Therefore, the criterion for significance was adjusted, using a Bonferroni approximation, to  $P = 0.025$  for pairwise comparison between two groups and  $P = 0.017$  for pairwise comparison between three groups.

## Results

### Analgesia with 0.5% Crystalline Lidocaine Solutions

None of the three control solutions (sterile water, 8.4% sodium bicarbonate (1:10), or epinephrine (1:100,000)) produced any impairment of nocifensive function, *i.e.*, a normal withdrawal response of 4 was present for 60 min after injection. Furthermore, there were no indications of motor deficits, such as foot pronation, toe curling, or dragging of the limb.

Considering onset time, alkalization of 0.5% lidocaine without epinephrine by either NaOH (LOH) or sodium bicarbonate (LBC) produced a faster onset than did unalkalinized lidocaine (L):  $3.2 \pm 1.3$  ( $P = 0.006$ ) and  $2.9 \pm 1.0$  min ( $P = 0.0024$ ) versus  $6.0 \pm 2.1$  min ( $\pm$  SD), respectively (fig. 1). Furthermore, onset times with either alkalinizing agent did not differ significantly from each other ( $P = 0.678$ ). Considering degree of block and duration of block, these parameters did not differ significantly among the three solutions. Mean values ( $\pm$  SD) of the lowest withdrawal response score achieved with the L, LBC, and LOH solutions were  $1.2 \pm 1.0$ ,  $1.0 \pm 0.8$ , and  $0.4 \pm 0.7$ , respectively ( $P \geq 0.059$ ) and those for duration of block were  $15.0 \pm 6.2$  min,  $11.4 \pm 3.0$  min, and  $17.8 \pm 7.8$  min. Duration of block achieved with the LBC solution was less, but insignificantly so, than that with both L ( $P = 0.054$ ) and LOH ( $P = 0.085$ ).

When 0.5% crystalline lidocaine with epinephrine (1:100,000) was alkalized to pH 7.85 with either sodium bicarbonate or sodium hydroxide, there were no significant differences ( $P \geq 0.1$ ) between the two in onset, degree, or duration of block (fig. 2). Mean onset times were  $2.8 \pm 1.0$  min for both, mean withdrawal response scores were  $0.0 \pm 0.0$  for LE and  $0.2 \pm 0.3$  for

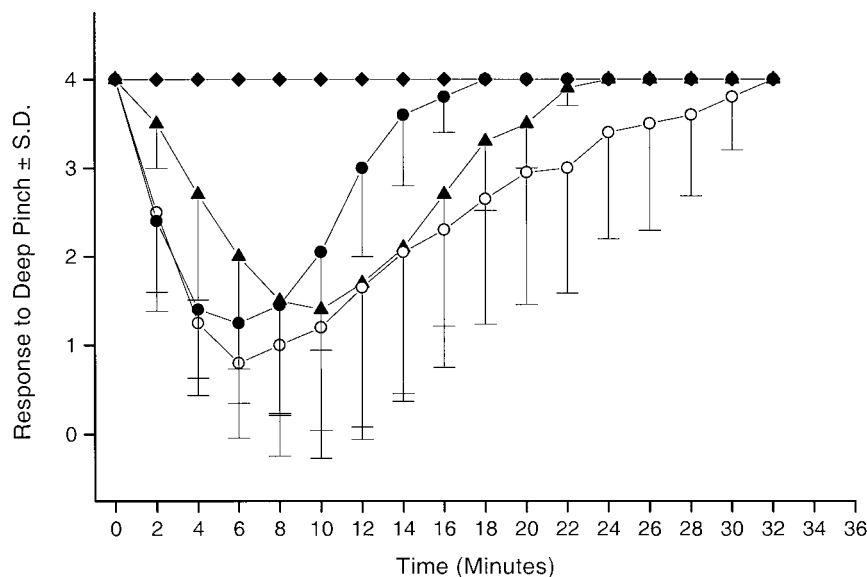

Fig. 1. Time course of analgesia (inhibition of the response to an intense pinch) after injection of 0.5% lidocaine hydrochloride solutions prepared from crystalline lidocaine hydrochloride: plain lidocaine hydrochloride (▲ L; pH = 5.1; n = 10); lidocaine hydrochloride alkalized with NaOH (○ LOH; pH = 7.8; n = 10); lidocaine hydrochloride alkalized with sodium bicarbonate (● LBC; pH = 7.8; n = 10); control (◆ n = 4).

Fig. 2. Time course of analgesia after injection of 0.5% lidocaine solutions with epinephrine prepared from crystalline lidocaine hydrochloride: lidocaine hydrochloride with epinephrine (1:100,000) and neutralized with NaOH ( $\square$  LE; pH = 7.9;  $n = 10$ ); lidocaine hydrochloride with 8.4% sodium bicarbonate (10:1) and epinephrine (1:100,000;  $\blacksquare$  LBCE; pH = 7.8;  $n = 10$ ); control ( $\blacklozenge$   $n = 4$ ).

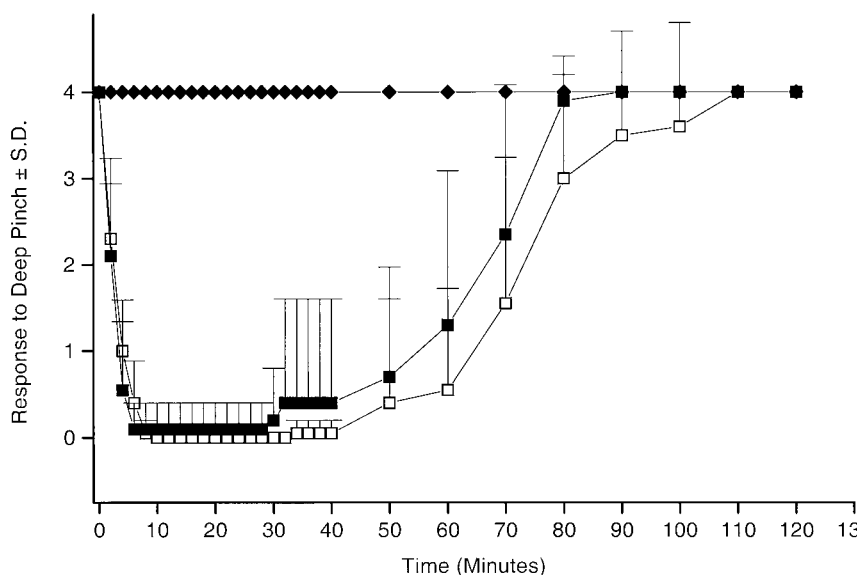

LBCE, and the mean durations of block were  $72.0 \pm 16.0$  min for LE and  $61.0 \pm 13.8$  min for LBCE.

#### *Analgesia with 0.5% Commercial Lidocaine Solutions*

Sciatic nerve injections with the three control solutions for this component of the study (see Methods) produced no analgesia or motor block indications for 60 min after injection.

Regarding onset time, with 0.5% commercial lidocaine without epinephrine, *i.e.*, CL, CLBC, and CLOH, it was not possible to compare this parameter among the solutions because several animals never achieved a withdrawal response score of 2, which was the criterion for onset. Assessment of degree of block showed that alkalization with sodium bicarbonate (CLBC) produced no significant difference in degree of analgesia (mean with-

drawal response score was  $3.0 \pm 0.6$ ) compared with unalkalinized lidocaine (CL,  $2.8 \pm 1.1$ ; fig. 3). However, alkalization with sodium hydroxide CLOH resulted in significantly greater degree of impairment ( $1.1 \pm 1.2$  than that with CL ( $P = 0.017$ ) and CLBC ( $P = 0.004$ ). With regard to block duration, there were no significant differences between unalkalinized lidocaine ( $13.2 \pm 8.1$  min) *versus* that alkalized with sodium bicarbonate ( $4.6 \pm 4.6$ ,  $P = 0.021$ ) or NaOH ( $12.8 \pm 5.5$ ). However, block duration with CLBC was significantly less than that with CLOH ( $P = 0.006$ ).

Compared with unalkalinized solutions of 0.5% commercial lidocaine with epinephrine (1:100,000; CLE) solutions alkalized with sodium bicarbonate (CLBCE) produced no significant differences relative to onset ( $4.0 \pm 1.3$  min for CLE and  $3.8 \pm 1.1$  min for CLBCE;  $P = 0.72$ ), degree (a score of  $0.0 \pm 0.0$  for both), or duration

Fig. 3. Time course of analgesia after injection of commercial 0.5% lidocaine solutions: plain lidocaine hydrochloride ( $\blacktriangle$  CL; pH = 6.6;  $n = 10$ ); lidocaine hydrochloride alkalized with NaOH ( $\circ$  CLOH; pH = 7.8;  $n = 10$ ); lidocaine hydrochloride alkalized with 8.4% sodium bicarbonate (10:1;  $\bullet$  CLBC; pH = 8.0;  $n = 10$ ); control ( $\blacklozenge$   $n = 4$ ).

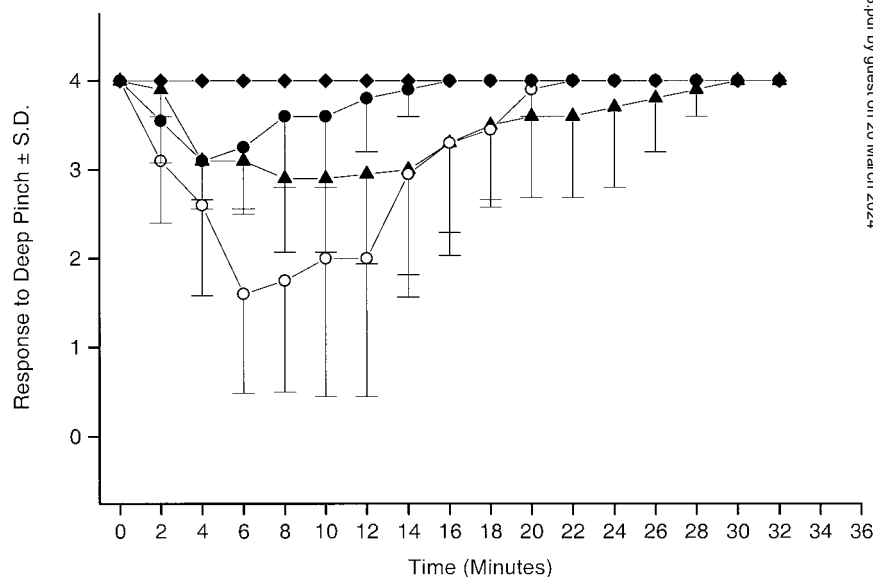

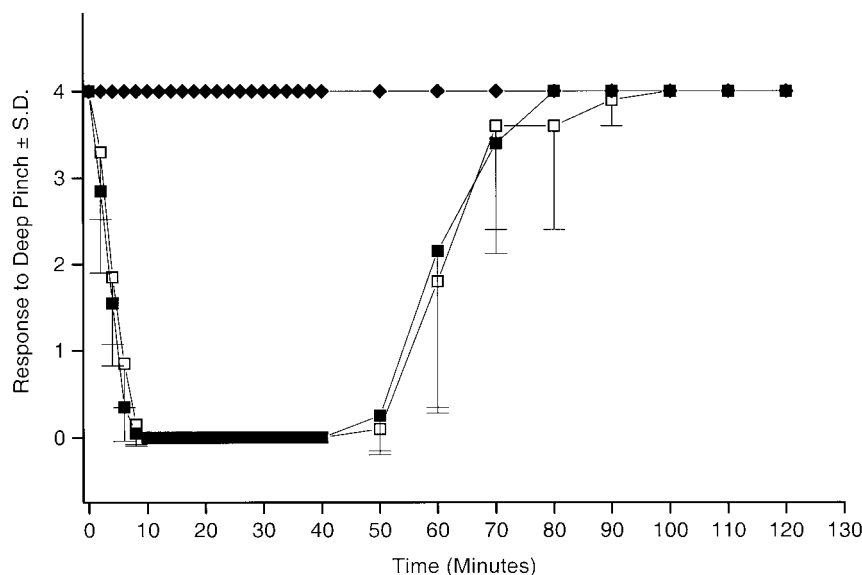

Fig. 4. Time course of analgesia after injection of commercial 0.5% lidocaine solutions with epinephrine: lidocaine with epinephrine (1:100,000;  $\square$  CLE; pH = 6.5;  $n = 10$ ); lidocaine with epinephrine (1:100,000) and 8.4% sodium bicarbonate (10:1;  $\blacksquare$  CLBCE; pH = 7.9;  $n = 10$ ); control ( $\blacklozenge$   $n = 4$ ).

of block ( $61.0 \pm 10.4$  min for CLE and  $57.0 \pm 7.8$  min for CLBCE;  $P = 0.3845$ ; fig. 4).

#### Analgesia with 1.0% Commercial Lidocaine Solutions

With 1% commercial lidocaine without epinephrine, there were no significant differences relative to onset time among the three solutions (fig. 5): CL was  $3.2 \pm 1.0$  min, CLBC was  $2.8 \pm 1.4$  min, and CLOH was  $2.4 \pm 0.8$  min;  $P \geq 0.0752$ . Relative to degree of block, the addition of sodium bicarbonate (\*CLBC) significantly ( $P \leq 0.011$ ) decreased the degree of block compared with both unalkalinized lidocaine (\*CL) and lidocaine with NaOH (\*CLOH). The mean withdrawal response score with \*CLBC was  $0.8 \pm 0.9$ , and with \*CL and \*CLOH it was  $0.0 \pm 0.0$ . Concerning duration of block, the addi-

tion of sodium bicarbonate significantly ( $P = 0.0002$ ) shortened the duration of block compared with both unalkalinized lidocaine and lidocaine alkalinized with NaOH. Mean duration of block with \*CLBC was  $14.4 \pm 5.1$  min; with \*CL it was  $55.0 \pm 13.6$  min, and with \*CLOH it was  $38.0 \pm 6.0$  min. The duration of block with unalkalinized lidocaine was significantly ( $P = 0.004$ ) greater than that with NaOH, a finding for which we have no ready explanation.

Adding sodium bicarbonate to 1% lidocaine with epinephrine (1:200,000) hastened the onset compared with unalkalinized ( $2.4 \pm 0.8$  for \*CLBC *vs.*  $4.4 \pm 1.3$  min for \*CLE;  $P = 0.004$ ; fig. 6). However, the addition of bicarbonate did not significantly ( $P \geq 0.9281$ ) alter the degree (a mean withdrawal response score of  $0.0 \pm 0.0$  for both) or duration of block ( $75.6 \pm 18.9$  min for \*CLE and  $77.8 \pm 11.3$  min for \*CLBC).

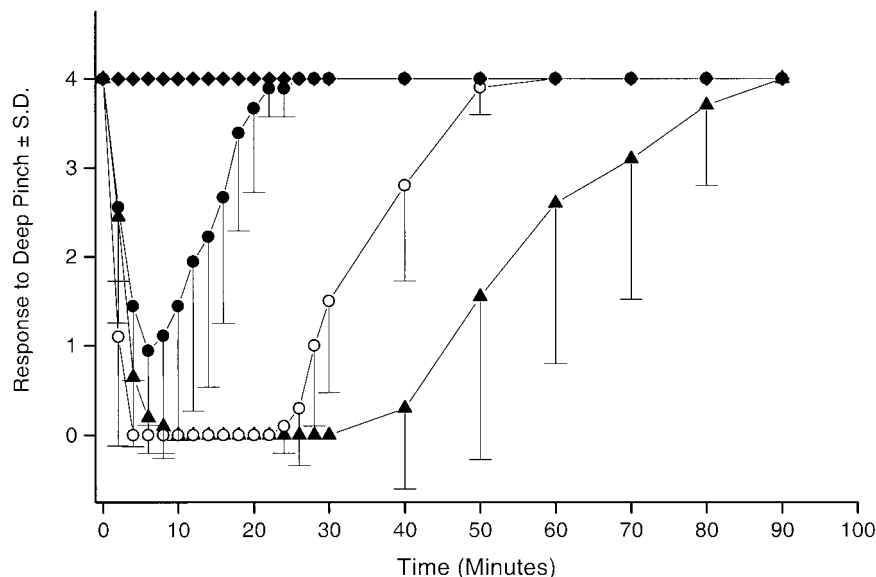

Fig. 5. Time course of analgesia after injection of commercial 1% lidocaine solutions: plain lidocaine hydrochloride ( $\blacktriangle$  CL; pH = 6.6;  $n = 10$ ); lidocaine hydrochloride alkalinized with NaOH ( $\circ$  CLOH; pH = 7.8;  $n = 10$ ); lidocaine hydrochloride alkalinized with 8.4% sodium bicarbonate (10:1;  $\bullet$  CLBC; pH = 7.8;  $n = 10$ ); control ( $\blacklozenge$   $n = 4$ ).

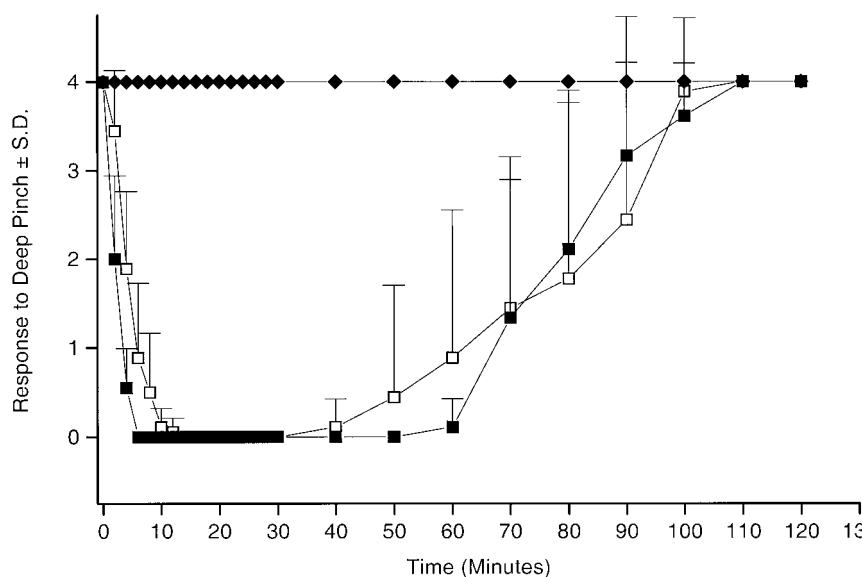

The results of our investigation show that the effects of sodium bicarbonate on the onset, degree, and duration of peripheral nerve block had two discrete manifestations: (1) they differed with respect to the presence or absence of epinephrine, and (2) they differed with respect to crystalline *versus* commercial lidocaine.

out added epinephrine, the reverse occurs, *i.e.*, block duration and degree of analgesia are substantially decreased by the addition of sodium bicarbonate without effecting onset, compared with that observed with no alkalization or alkalization with NaOH. In contrast, when 1.0% lidocaine is coinjected with epinephrine, bicarbonate hastens onset.

Our finding that adding sodium bicarbonate to 1% commercial lidocaine without epinephrine does not affect onset time has been previously described in clinical studies. It was shown that alkalization with sodium bicarbonate of 2% commercial lidocaine without epinephrine did not affect the onset of epidural anesthesia nor did it affect the onset of action of 1% lidocaine during subcutaneous injection.<sup>9</sup> However, other studies have reported conflicting results. Two investigations have shown that alkalization with sodium bicarbonate does accelerate the onset time of lidocaine. The addition of sodium bicarbonate to 2% lidocaine produced a faster onset of epidural block in one study<sup>2</sup> and of peribulbar anesthesia in another.<sup>5</sup> Unfortunately, in none of these clinical studies was the injectate pH reported, before or after adjuvant addition. No clinical studies report the results of addition of NaOH to local anesthetic solutions. We wish to point out that NaOH is not approved for clinical use as an alkalizing agent for local anesthetics and do not advocate its use for this purpose until rigorous clinical testing of its safety and efficacy is performed.

Our finding that sodium bicarbonate may shorten the block duration of lidocaine when it is not coinjected with epinephrine, compared with unalkalinized and alkalinized with NaOH, conflicts with the results of one study. Parham and Pasieka<sup>9</sup> showed that adding sodium bicarbonate to 1% lidocaine without epinephrine did not affect its duration of action after subcutaneous injection.

Anesthesiology, V 93, No 4, Oct 2000



for the effect of sodium bicarbonate on lidocaine's duration of action.<sup>10</sup> However, no precipitate was observed by visual inspection during any component of our study. Furthermore, lidocaine adjusted to the identical pH with NaOH did not decrease the duration or lessen the degree of analgesia, indicating that precipitation probably did not occur. Because lidocaine solutions at the same pH have the same concentration of the base form of the local anesthetic, one would expect solutions at the same pH to precipitate at the same rate.

At the lower concentration (0.5%) of commercial lidocaine used here, alkalization with NaOH increased the degree of block almost twofold compared with plain acidic lidocaine hydrochloride. At the higher concentration (1.0%) of commercial lidocaine, this effect of NaOH was not observed because both solutions produced complete nerve block. This effect was only observed with commercial lidocaine solutions, and not with solutions prepared in our laboratory of identical lidocaine concentration but different composition. We cannot explain the differences between commercial lidocaine solutions and crystalline lidocaine hydrochloride solutions in absolute effect or modulation of block by bicarbonate.

Bicarbonate's reduction of analgesia by lidocaine has not been reported in clinical studies. Curatolo *et al.*<sup>2</sup> found that adding sodium bicarbonate to 2% lidocaine during epidural block at L2-L3 resulted in an apparent potentiation of block, indicated by significantly higher pain thresholds for both repeated electrical stimulation (five pulses at 2 Hz) and pin prick compared with plain lidocaine hydrochloride. The discrepancy between these actions of bicarbonate in the laboratory and clinic may arise from either the different routes of administration (epidural *vs.* peripheral nerve), the anatomic scale of the blocked nerves (5–10-mm diameter for human spinal roots *vs.* 1–2 mm for rat sciatic nerve), or the difference in vascular beds at the two loci. Rat and human peripheral nerve fibers have almost identical action potential mechanisms; therefore, the difference is unlikely to reside in the pharmacodynamics of nerve block, *i.e.*, blockade of action potential caused by inhibition of Na<sup>+</sup> channels.

With 0.5% lidocaine with epinephrine (1:100,000), there were no differences in degree or duration of block when sodium bicarbonate was added. However, adding sodium bicarbonate to commercial 1% lidocaine with epinephrine (1:200,000) did accelerate the onset. Perhaps this resulted from elevation of the low pH (4.5) of the 1% solution, a situation that often occurs with epinephrine-containing solutions and that would be expected to accelerate block onset.

In regional anesthesia, it is generally believed that

alkalinization with sodium bicarbonate reduces pain on injection by increasing pH (acidic solutions *per se* are algogenic), decreases onset time, and perhaps produces a more complete block by elevating the pH of the lidocaine solutions closer to the pK<sub>a</sub> of this local anesthetic (7.8), thus favoring the proportion of the deprotonated, membrane-permeant form of the local anesthetic.<sup>11,12</sup> Furthermore, ion trapping of charged local anesthetic inside the nerve axons, resulting from axoplasmic acidification, has also been posited, although experimental evidence for this is weak.<sup>13</sup> Our investigation has not validated the expectation of enhanced blockade, although the expected physical chemical changes in the drug do occur with alkalization, and lidocaine block of nerve impulses *in vitro* is potentiated by bicarbonate.<sup>13–15</sup> Sodium bicarbonate alkalization may reduce onset time, but it also decreases the degree and duration of analgesia. These observations in rats indicate that further clinical investigations are necessary to elucidate the role of sodium bicarbonate alkalization of plain lidocaine and lidocaine containing epinephrine on the quality of peripheral nerve block.

## References

1. Fukuda T, Naito H: The effect of pH adjustment of 1% lidocaine on the onset of sensory and motor blockade of epidural anesthesia in nonpregnant gynecological patients. *J Anesth* 1994; 8:293–6
2. Curatolo M, Petersen-Felix S, Arendt-Nielsen L, Lauber R, Hogstrom H, Scaramozzino P, Luginbuhl M, Sieber TJ, Zbinden AM: Adding sodium bicarbonate to lidocaine enhances the depth of epidural blockade. *Anesth Analg* 1998; 86:341–7
3. Gosteli P, Van Gessel E, Gamulin Z: Effects of pH adjustment and carbonation of lidocaine during epidural anesthesia for foot and ankle surgery. *Anesth Analg* 1995; 81:104–9
4. Chow MYH, Sia ATH, Koay CK, Chan YW: Alkalization of lidocaine does not hasten the onset of axillary brachial plexus block. *Anesth Analg* 1998; 86:566–8
5. Zahl K, Jordan A, McGroarty J, Sorensen B, Gotta AW: The effect of bicarbonate on mixtures of lidocaine, bupivacaine and hyaluronidase with or without epinephrine. *Ophthalmology* 1991; 98:239–42
6. Thalhammer JG, Vladimirova M, Bershadsky B, Strichartz GR: Neurologic evaluation of the rat during sciatic nerve block with lidocaine. *ANESTHESIOLOGY* 1995; 82:1013–25
7. Popitz-Bergez FA, Lee Son S, Strichartz GR, Thalhammer JG: Relation between functional deficit and intraneural local anesthetic during peripheral nerve block. *ANESTHESIOLOGY* 1995; 83:583–92
8. Gaggero G, Meyer O, Van Gessel E, Rifat E: Alkalization of lidocaine 2% does not influence the quality of epidural anesthesia for elective Caesarean section. *Can J Anaesth* 1995; 42:1080–4
9. Parham SM, Pasieka JL: Effect of pH modification by bicarbonate on pain after subcutaneous lidocaine injection. *Can J Surg* 1996; 39:31–5
10. Peterfreund RA, Datta S, Osteheimer GW: pH adjustment of local anesthetic solutions with sodium bicarbonate: Laboratory evaluation of alkalization and precipitation. *Reg Anesth* 1989; 14:265–70
11. Catchlove RFH: Potentiation of two different local anesthetics by carbon dioxide. *Br J Anaesth* 1973; 45:471–4
12. Ritchie JM, Greengard P: On the mode of action of local anesthetics. *Annu Rev Pharmacol* 1966; 6:405–30
13. Wong K, Strichartz GR, Raymond SA: On the mechanisms of potentiation of local anesthetics by bicarbonate buffer: Drug structure-activity studies on isolated peripheral nerve. *Anesth Analg* 1993; 76:131–43
14. Catchlove RFH: The influence of CO<sub>2</sub> and pH on local anesthetic action. *J Pharmacol Exp Ther* 1972; 181:298–309
15. Bokesch PM, Raymond SA, Strichartz GR: Dependence of lidocaine potency on pH and PCO<sub>2</sub>. *Anesth Analg* 1987; 66:9–17
